# Supplementary material for: Stability of SARS-CoV-2 in Biological Fluids of Animals
Source: MDPI journal article supplement (doi:10.3390/v15030761), 2023-03-16
Supplement: s1 [file s1]

**Supplementary Table 1.** Comparison of consensus amino acid sequences among virus stocks used in this study.

| Viral protein | Amino acid position | WA-1 lineage A <sup>1, 2</sup> | Alpha VOC B.1.1.7 <sup>2</sup> | Delta VOC B.1.617.2 <sup>2</sup> | Omicron VOC B.1.1.529 <sup>2</sup> |
|---------------|---------------------|--------------------------------|--------------------------------|----------------------------------|------------------------------------|
| Spike         | 19                  | T                              | T                              | R                                | T                                  |
|               | 67                  | A                              | A                              | A                                | V                                  |
|               | 69–70               | HV                             | Deletion                       | HV                               | Deletion                           |
|               | 95                  | T                              | T                              | T                                | I                                  |
|               | 142                 | G                              | G                              | D                                | D                                  |
|               | 143–144             | VY                             | VY                             | VY                               | Deletion                           |
|               | 145                 | Y                              | Deletion                       | Y                                | Deletion                           |
|               | 156                 | E                              | E                              | G                                | E                                  |
|               | 157–158             | FR                             | FR                             | Deletion                         | FR                                 |
|               | 211                 | N                              | N                              | N                                | Deletion                           |
|               | 212                 | L                              | L                              | L                                | I                                  |
|               | 214                 |                                |                                |                                  | EPE (Insertion)                    |
|               | 242–244             | LAL                            | LAL                            | LAL                              | LAL                                |
|               | 339                 | G                              | G                              | G                                | D                                  |
|               | 371                 | S                              | S                              | S                                | L                                  |
|               | 373                 | S                              | S                              | S                                | P                                  |
|               | 375                 | S                              | S                              | S                                | F                                  |
|               | 417                 | K                              | K                              | K                                | N                                  |
|               | 440                 | N                              | N                              | N                                | K                                  |
|               | 446                 | G                              | G                              | G                                | S                                  |
|               | 452                 | L                              | L                              | R                                | L                                  |
|               | 477–478             | ST                             | ST                             | SK                               | NK                                 |
|               | 484                 | E                              | E                              | E                                | A                                  |
|               | 493                 | Q                              | Q                              | Q                                | R                                  |
|               | 496                 | G                              | G                              | G                                | S                                  |
|               | 498                 | Q                              | Q                              | Q                                | R                                  |
|               | 501                 | N                              | Y                              | N                                | Y                                  |
|               | 505                 | Y                              | Y                              | Y                                | H                                  |
|               | 547                 | T                              | T                              | T                                | K                                  |
|               | 570                 | A                              | D                              | A                                | A                                  |
|               | 614                 | D                              | G                              | G                                | G                                  |
|               | 655                 | H                              | H                              | H                                | Y                                  |
|               | 679                 | N                              | N                              | N                                | K                                  |
|               | 681                 | P                              | H                              | R                                | H                                  |
|               | 701                 | A                              | A                              | A                                | V                                  |
|               | 716                 | T                              | I                              | T                                | T                                  |
|               | 764                 | N                              | N                              | N                                | K                                  |
|               | 771                 | A                              | A                              | S                                | A                                  |
|               | 796                 | D                              | D                              | D                                | Y                                  |
|               | 856                 | N                              | N                              | N                                | K                                  |
|               | 950                 | D                              | D                              | N                                | D                                  |
|               | 954                 | Q                              | Q                              | Q                                | H                                  |
|               | 969                 | N                              | N                              | N                                | K                                  |
|               | 981                 | L                              | L                              | L                                | F                                  |
|               | 982                 | S                              | A                              | S                                | S                                  |
|               | 1118                | D                              | H                              | D                                | D                                  |
| Envelope      | 9                   | T                              | T                              | T                                | I                                  |
| Matrix        | 3                   | D                              | D                              | D                                | G                                  |

|              |         |     |               |          |          |
|--------------|---------|-----|---------------|----------|----------|
| Nucleocapsid | 19      | Q   | Q             | Q        | E        |
|              | 63      | A   | A             | A        | T        |
|              | 82      | I   | I             | T        | I        |
|              | 3       | D   | L             | D        | D        |
|              | 13      | P   | P             | P        | L        |
|              | 31–33   | ERS | ERS           | ERS      | Deletion |
|              | 63      | D   | D             | G        | D        |
|              | 139     | L   | L             | F        | L        |
|              | 203–204 | RG  | KR            | MG       | KR       |
|              | 235     | S   | F             | S        | S        |
| NSP2         | 377     | D   | D             | Y        | D        |
|              | 385     | R   | R             | K        | R        |
| NSP3         | 129     | P   | P             | L        | P        |
|              | 38      | K   | K             | K        | R        |
|              | 183     | T   | I             | T        | T        |
|              | 822     | P   | P             | L        | P        |
|              | 890     | A   | D             | A        | A        |
|              | 1069    | V   | V             | V        | I        |
|              | 1265    | S   | S             | S        | Deletion |
|              | 1266    | L   | L             | L        | I        |
|              | 1274    | H   | H             | Y        | H        |
|              | 1305    | A   | V             | A        | A        |
|              | 1412    | I   | T             | I        | I        |
|              | 1892    | A   | A             | A        | T        |
| NSP4         | 446     | A   | A             | V        | A        |
|              | 492     | T   | T             | T        | I        |
| NSP5         | 132     | P   | P             | P        | H        |
| NSP6         | 105     | L   | L             | L        | Deletion |
|              | 106     | S   | Deletion      | S        | Deletion |
|              | 107     | G   | Deletion      | G        | Deletion |
|              | 108     | F   | Deletion      | F        | F        |
|              | 149     | V   | V             | A        | V        |
|              | 189     | I   | I             | I        | V        |
| NSP12        | 323     | P   | L             | L        | L        |
|              | 671     | G   | G             | S        | G        |
| NSP13        | 77      | P   | P             | L        | P        |
|              | 460     | K   | R             | K        | K        |
| NSP14        | 42      | I   | I             | I        | V        |
|              | 347     | E   | G             | E        | E        |
| NSP15        | 234     | H   | H             | Y        | H        |
| ORF3a        | 26      | S   | S             | L        | S        |
|              | 57      | Q   | Q             | Q        | Q        |
|              | 131     | W   | W             | W        | W        |
|              | 171     | S   | S             | S        | S        |
| ORF7a        | 82      | V   | V             | A        | V        |
|              | 116     | L   | L             | F        | L        |
|              | 120     | T   | T             | I        | T        |
| ORF8         | 27      | Q   | Stop codon    | Q        | Q        |
|              | 84      | S   | Truncated; L  | L        | L        |
|              | 119–120 | DF  | Truncated; DF | Deletion | DF       |

<sup>1</sup> Two different virus stocks of the WA-1 strain were used in this study. One WA-1 virus stock was grown in Vero E6 cells and was used to determine the SARS-CoV-2 stability in biological fluids derived from

cats, sheep, and white-tailed deer (WTD). The Vero E6 cell derived virus stock contained a KLRS insertion (between amino acid positions 215-216 of the reference sequence) in the spike glycoprotein which was found at a frequency of 44%. The other WA-1 stock virus was grown in Vero-TMPRSS2 cells for side-by-side comparisons with SARS-CoV-2 VOCs in 10% WTD fecal suspension. The Vero-TMPRSS2 cells derived virus stock had a synonymous mutation at position 1912 (C/T) in the nsp2 region.

<sup>2</sup> Between 50 to 120 non-coding sequences of the 5' and 3' termini were not determined.
